# Supplementary material for: Polycationic HA/CpG Nanoparticles Induce Cross-Protective Influenza Immunity in Mice
Source: PubMed Central journal article supplement — ACS Appl Mater Interfaces. 2022 Jan 27;14(5):6331–42. doi: 10.1021/acsami.1c19192 (PMC8832387; doi:10.1021/acsami.1c19192), 2022-01-27
Supplement: am1c19192_si_001.pdf [file am1c19192_si_001.pdf]

## ***Supporting Information***

### **Polycationic HA/CpG Nanoparticles Induce Cross-Protective Influenza Immunity in Mice**

Chunhong Dong, Ye Wang, Wandu Zhu, Yao Ma, Joo Kim, Lai Wei, Gilbert X. Gonzalez, and Bao-Zhong Wang\*

Center for Inflammation, Immunity & Infection, Georgia State University Institute for Biomedical Sciences, Atlanta, Georgia 30303, USA

\*Bao-Zhong Wang

**Email:** [bwang23@gsu.edu](mailto:bwang23@gsu.edu)

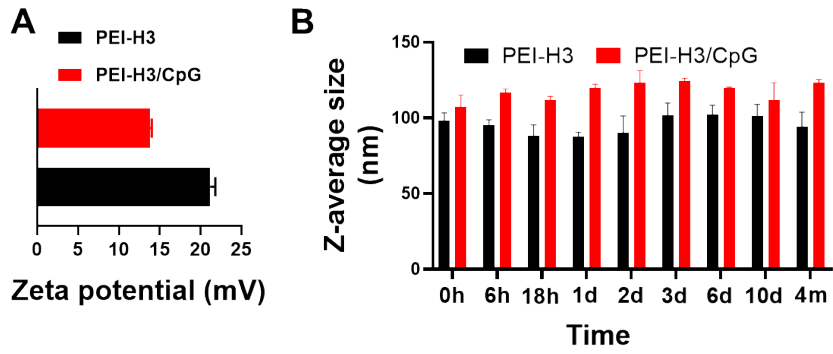

Figure S1. (A) Nanoparticle Zeta potential determined by Malvern Zetasizer. (B) Nanoparticle size stability at 4 °C.

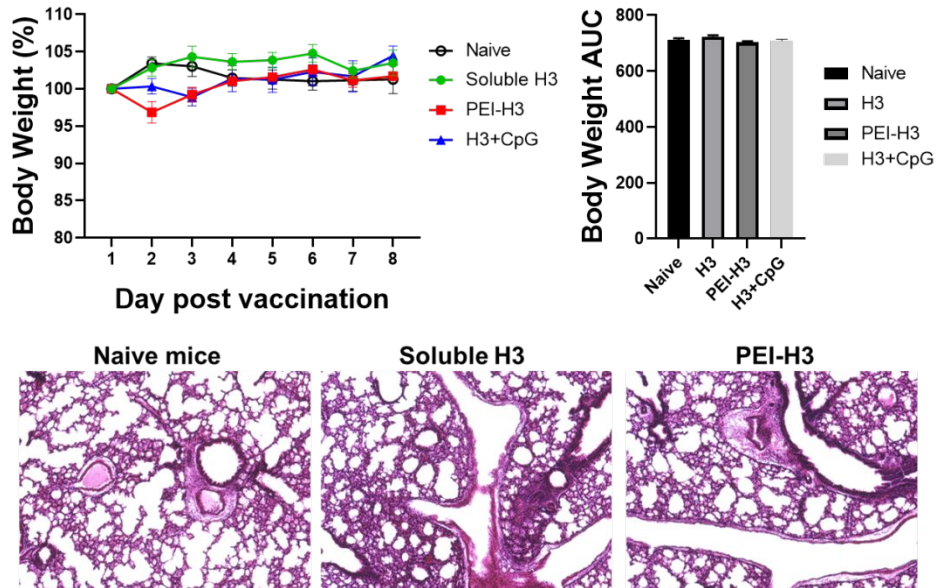

Figure S2. Mouse body weight changes and inflammatory cell infiltration in lungs 7 days post-vaccination.

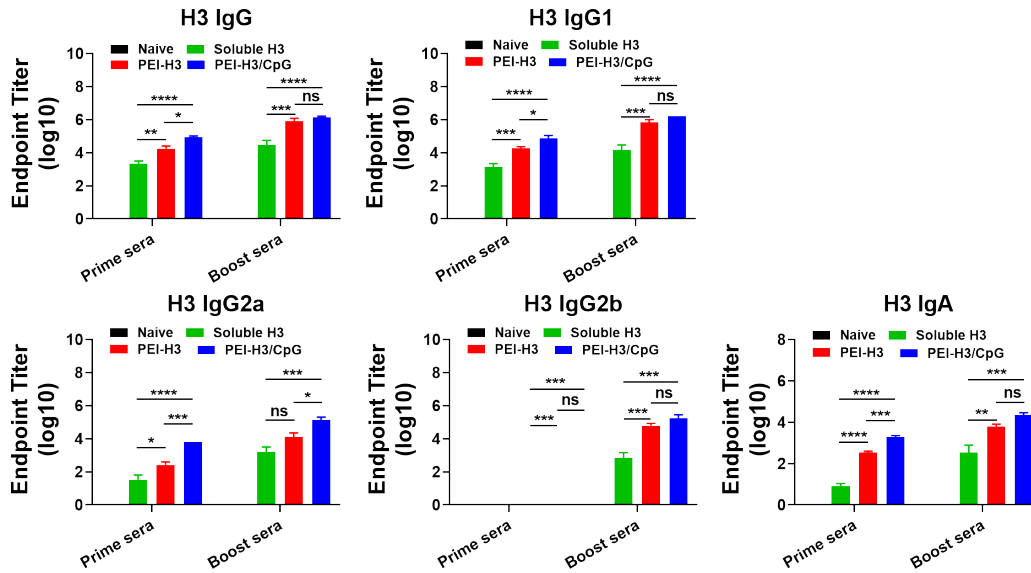

Figure S3. H3-specific IgG and IgA endpoint titers in mouse immune sera.

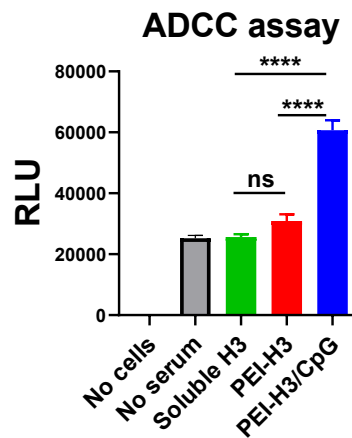

Figure S4. ADCC assay results for immune sera at a 1:250 dilution.

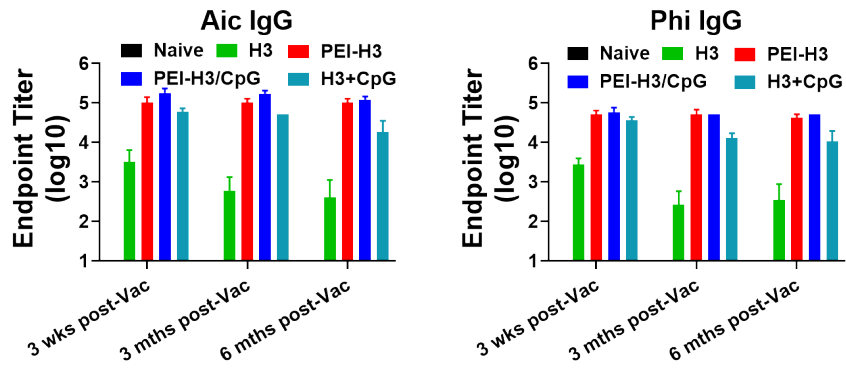

Figure S5. Long-term serum antibody titers against Aic and Phi viruses over six months post-boosting immunization.

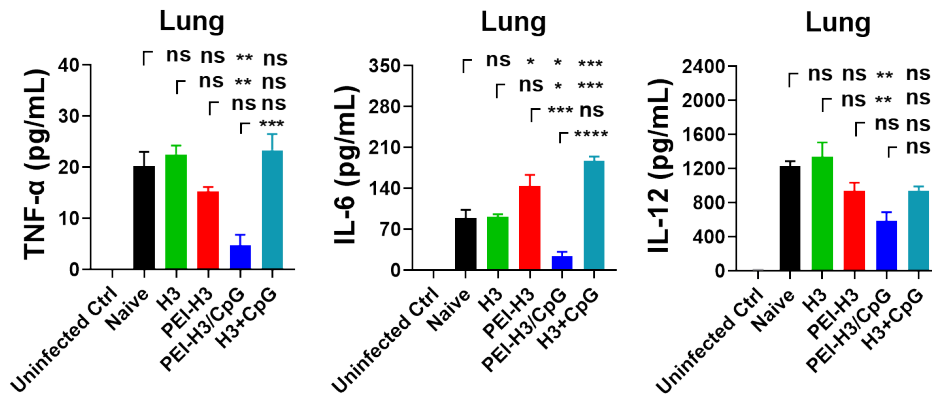

Figure S6. Inflammatory cytokine (TNF- $\alpha$ , IL-6, and IL-12) levels in lung supernatants of infected mice.

**Table S1.** Comparative analysis of the hemagglutinin (HA) amino acid sequences between influenza A/Aichi/2/1968 and A/Philippines/2/1982 or A/Wisconsin/15/2009 strains.

|                                                                                   |                                                                                                                                                                                                                                                                                                                                                                                                                                                                                                                                                                                                                                                         |
|-----------------------------------------------------------------------------------|---------------------------------------------------------------------------------------------------------------------------------------------------------------------------------------------------------------------------------------------------------------------------------------------------------------------------------------------------------------------------------------------------------------------------------------------------------------------------------------------------------------------------------------------------------------------------------------------------------------------------------------------------------|
| <p>(A)<br/>Amino acid sequence of influenza A virus (A/Aichi/2/1968) HA</p>       | <p>MKTIIALSYIFCLPLGQDLPGNDNSTATLCLGHHAVPNGTLVKTITDDQIEVTNAT<br/>ELVQSSSTGKICNNPHRILDGIDCTLIDALLGDPHCDVFQNETWDLFVERSKAFS<br/>NCYPYDVPDYASLRSLVASSGTLEFITEGFTWTGVTQNGGSNACKRGP GSGFF<br/>SRLNWLTKSGSTYPVLNVTMPNNDNFDKLYIWGIHHPSTNQEQTSLYVQASGR<br/>VTVSTRRSQQTII PNIGSRPWV RGLSSRISYWTIVKPGDVLVINSNGNLIAPRGY<br/>FKMRTGKSSIMRSDAPIDTCISECITPNGSIPNDKPFQNVNKITYGACPKYVKQN<br/>TLKLATGMRNVPEKQTRGLFGAIAGFIENGWEGMIDGWYGF RHQNSEG TGQA<br/>ADLKSTQAAIDQINGKLN RVIEKTNEKFHQIEKEFSEVEGRIQDLEKYVEDTKIDL<br/>WSYNAELLVALENQHTIDL TDSEMKNLFEKTRRQLRENAEEMGNGCFKIYHKC<br/>DNACIESIRNGTYDHDVYRDEALNNRFQIKGVELKSGYKDWILWISFAISCFLLCV<br/>VLLGFIMWACQRGNIRCNICI</p>   |
| <p>(B)<br/>Amino acid sequence of influenza A virus (A/Philippines/2/1982) HA</p> | <p>MKTIIALSYMFCLVFAQNLP GNDNSTATLCLGHHAVPNGTLVKTITNDQIEVTNAT<br/>ELVQSSSTGRICDSPHRILDGKNCTLIDALLGDPHCDGFQNEKWDLFVERSKAF<br/>SNCYPYDVPDYASLRSLVASSGTLEFINEGFNWTGVTQSGGSYTCRGRSNN SF<br/>FSRLNWLYESES KYPVLNVTMPNNGKFDKLYIWGIHHPSTDKEQTNL YIRASGR<br/>VTVSTKRSQQTVIPNIGSRPWV RGLSSRISYWTIVKPGDILLINSTGNLIAPRGYF<br/>KIRTKGSSIMRSDAPIGTCSEECITPNGSIPNDKPFQNVNKITYGACPRYVKQNTL<br/>KLATGMRNVPEKQTRGIFGAIAGFIENGWEGMVDGWYGF RHQNSEG TGQA<br/>ADLKSTQAAIDQINGKLN RVIEKTNEKFHQIEKEFSEVEGRIQDLEKYVEDTKIDLWS<br/>YNAELLVALENQHTIDL TDSEMKNLFEKTRKQLRENAEDMGNGCFKIYHKCDNA<br/>CIGSIRNGTYDHDVYRDEALNNRFQIKGVELKSGYKDWILWISFAISCFLLCVLL<br/>GFIMWACQKGNIRCNICI</p>  |
| <p>(C) Amino acid sequence of influenza A virus (A/Wisconsin/15/2009) HA</p>      | <p>MKTIIALSYILCLVFAQKLP GNDNSTATLCLGHHAVPNGTIVKTITNDQIEVTNATE<br/>LVQSSSTGEICDSPHQILDGKNCTLIDALLGDPQCDGFQNKKWDLFVERSKAYS<br/>NCYPYDVPDYASLRSLVASSGTLEFNNE SFNWTGVTQNGTSSACIRRSKNSFF<br/>SRLNWLTHLNFKYPALNVTMPNNEQFDKLYIWGVHHPGTDKDKQIFPYAQASGRI<br/>TVSTKRSQQT AIPNIGSRPRVRNIPSRISYWTIVKPGDILLINSTGNLIAPRGYFKI<br/>RSGKSSIMRSDAPIGKCNSEECITPNGSIPNDKPFQNVNRITYGACPRYVKQNTLK<br/>LATGMRNVPEKQTRGIFGAIAGFIENGWEGMVDGWYGF RHQNSEG RGQA<br/>ADLKSTQAAIDQINGKLN RLIGKTNEKFHQIEKEFSEVEGRIQDLEKYVEDTKIDLWSY<br/>NAELLVALENQHTIDL TDSEMKNLFEKTKKQLRENAEDMGNGCFKIYHKCDNAC<br/>IGSIRNGTYAHDVYRDEALNNRFQIKGVELKSGYKDWILWISFAISCFLLCVALLG<br/>FIMWACQKGNIRCNICI</p> |
| <p>Difference between A and B</p>                                                 | <p>8.48%, as determined by the NCBI protein BLAST tool.</p>                                                                                                                                                                                                                                                                                                                                                                                                                                                                                                                                                                                             |
| <p>Difference between A and C</p>                                                 | <p>13.43%, as determined by the NCBI protein BLAST tool.</p>                                                                                                                                                                                                                                                                                                                                                                                                                                                                                                                                                                                            |
